# Supplementary material
Source: PubMed Central journal article supplement (PMC2268831)

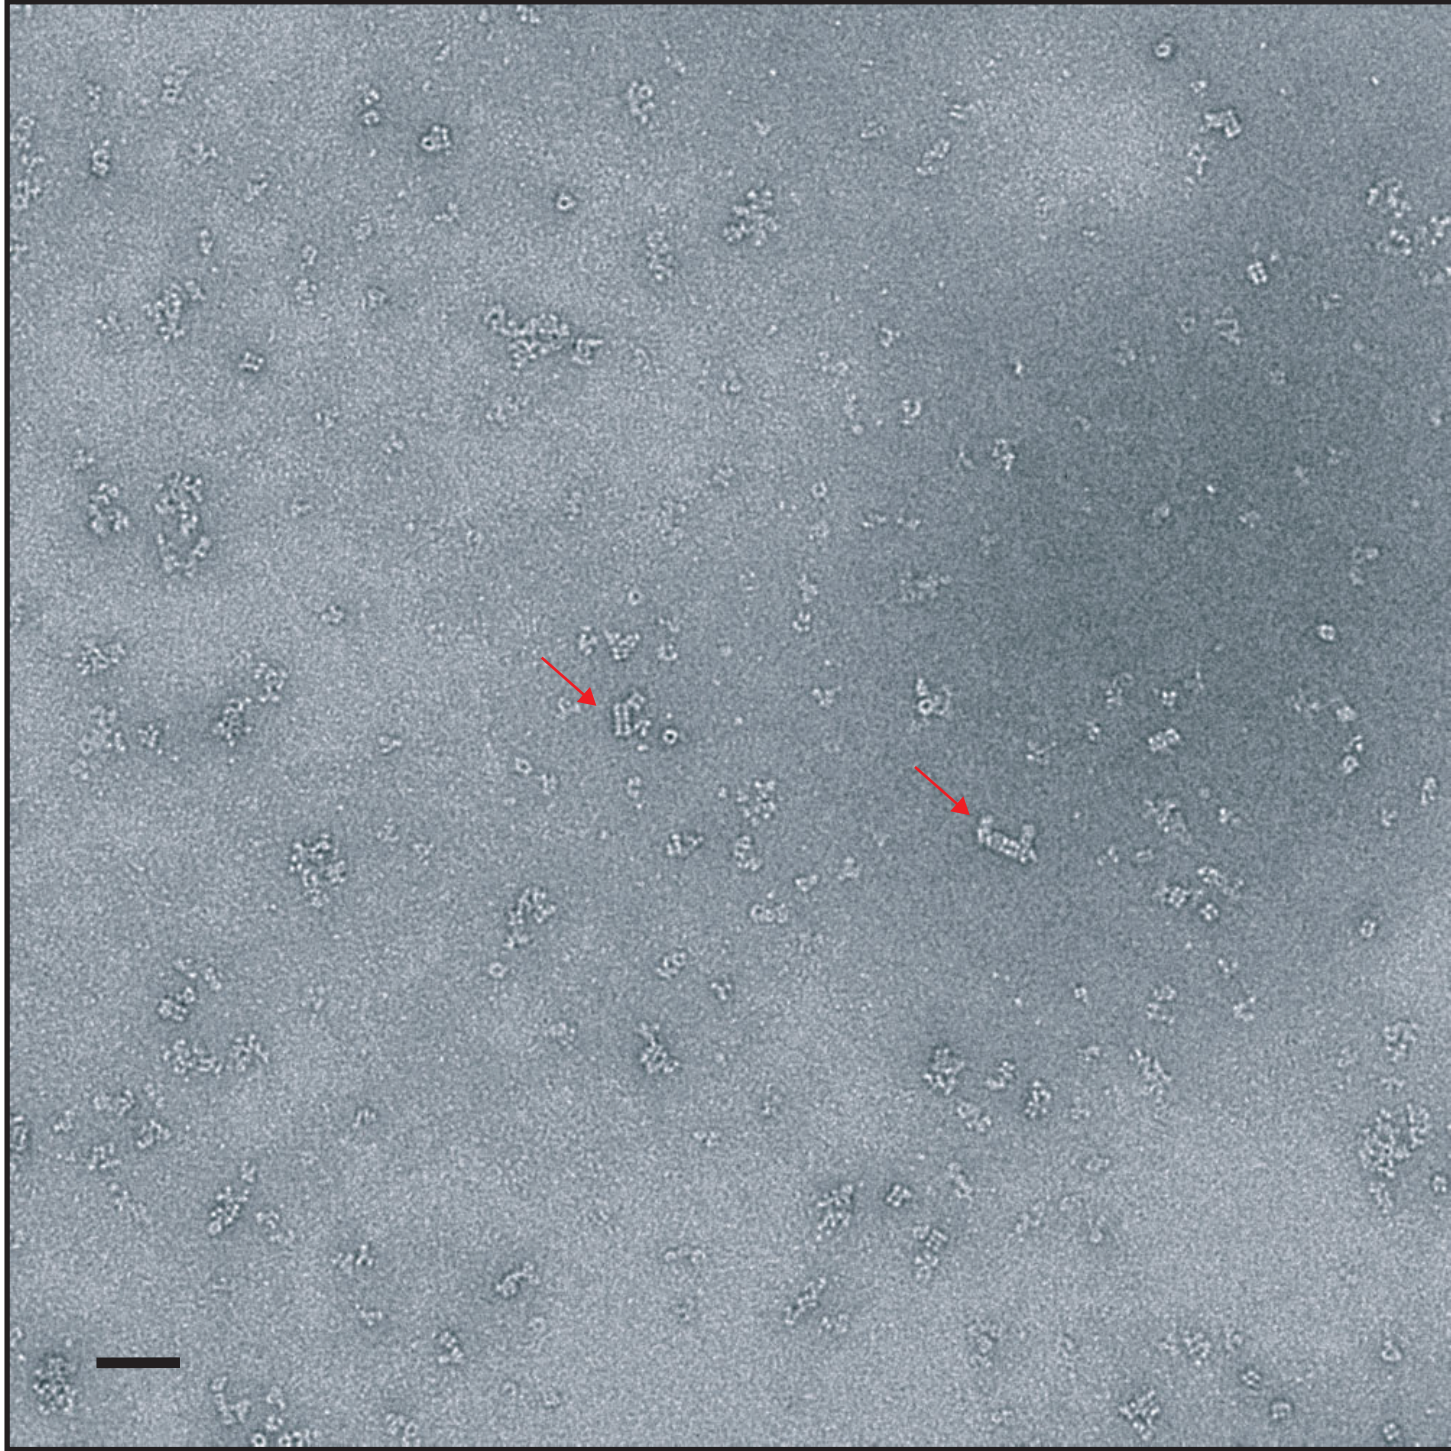

Supplement: pnas_0712247105_5.pdf [file pnas_0712247105_5.pdf]
